# Supplementary material
Source: PubMed Central journal article supplement (PMC8024661)
Supplement: mmc1.pdf [file mmc1.pdf]

iScience, Volume 24

## **Supplemental information**

### **ORF8 contributes to cytokine storm during SARS-CoV-2 infection by activating IL-17 pathway**

**Xiaoyuan Lin, Beibei Fu, Songna Yin, Zhifeng Li, Huawen Liu, Haiwei Zhang, Na Xing, Yu Wang, Weiwei Xue, Yan Xiong, Shanfu Zhang, Qingting Zhao, Shiyao Xu, Jing Zhang, Peihui Wang, Weiqi Nian, Xingsheng Wang, and Haibo Wu**

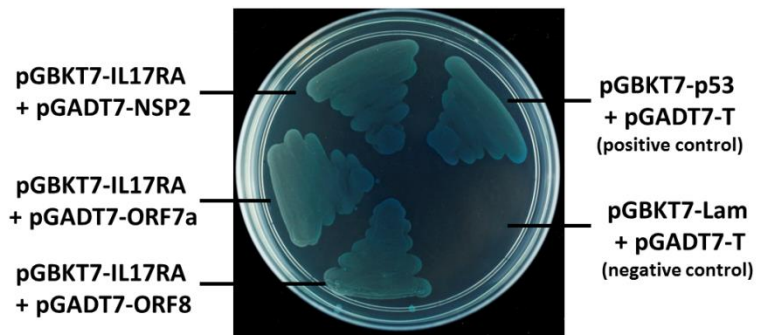

- 1 Figure S1 NSP2, ORF7a and ORF8 are the potential candidates that interacts
- 2 with IL17RA. Related to Figure 1.
- 3 Positive clones obtained by yeast two-hybrid screening. pGBKT7-p53+pGADT7-T:
- 4 positive control; pGBKT7-Lam+pGADT7-T: negative control.

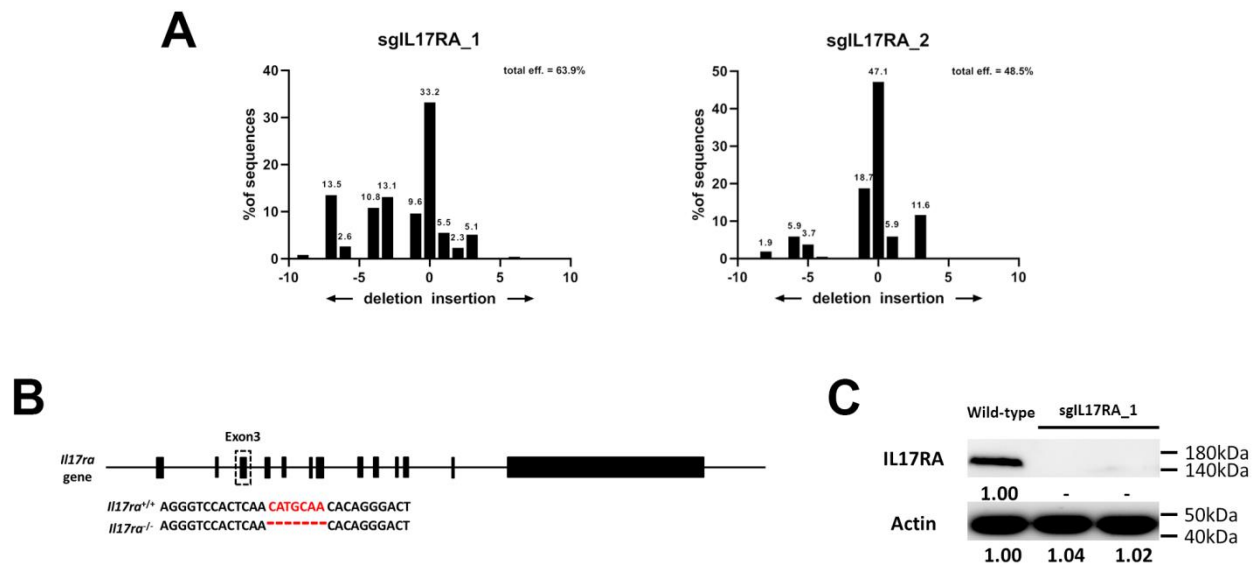

5 Figure S2 **Validation of *Il17ra*-deficient RAW264.7 cells. Related to Figure 1.**

6 (A) TIDE analysis of *Il17ra*<sup>-/-</sup> RAW264.7 cell pools produced by sgRNA1 and

7 sgRNA2. (B) Schematic illustration of the target region of *Il17ra*<sup>-/-</sup> RAW264.7 cell

8 clone. (C) IL17RA expression in *Il17ra*<sup>-/-</sup> RAW264.7 cell clone was analyzed by

9 Western Blotting. The clone was derived from the cell pool produced by sgRNA1.

10 Data are representative of three independent experiments (C).

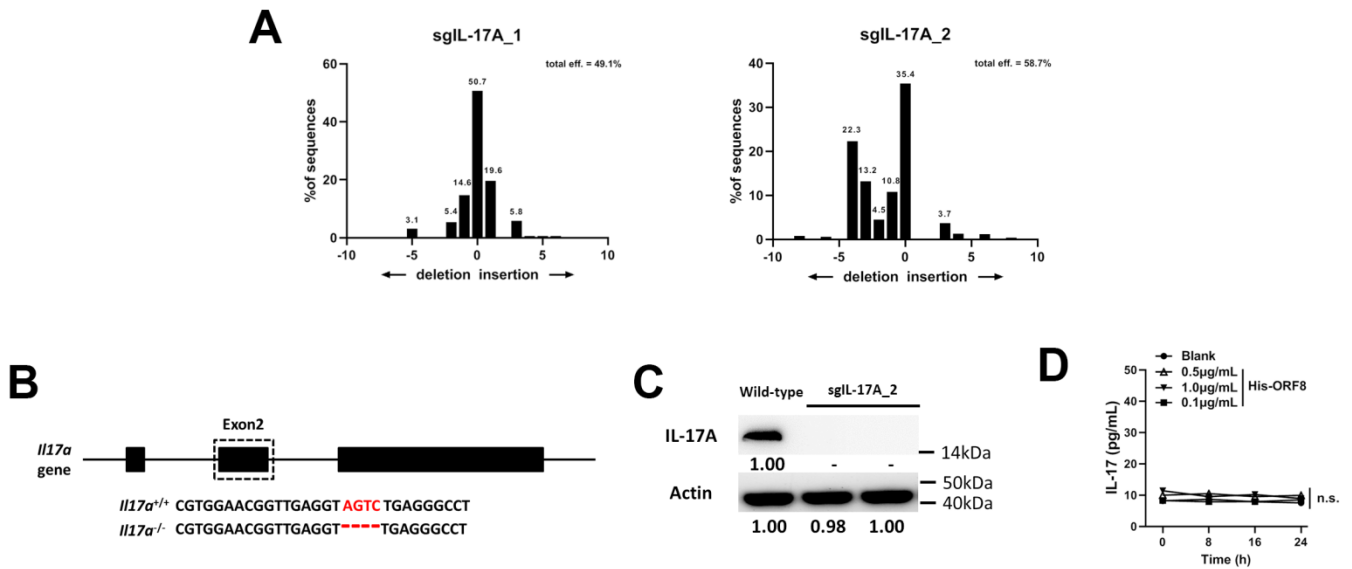

11 **Figure S3 Validation of *Il17a*-deficient RAW264.7 cells. Related to Figure 1.**

12 (A) TIDE analysis of *Il17a*<sup>-/-</sup> RAW264.7 cell pools produced by sgRNA1 and

13 sgRNA2. (B) Schematic illustration of the target region of *Il17a*<sup>-/-</sup> RAW264.7 cell

14 clone. (C) IL-17A expression in *Il17a*<sup>-/-</sup> RAW264.7 cell clone was analyzed by

15 Western Blotting. The clone was derived from the cell pool produced by sgRNA2. (D)

16 His-ORF8 was added to culture media of *Il17a*<sup>-/-</sup> RAW264.7 cells, and IL-17

17 expression was analyzed by ELISA. Data are representative of three independent

18 experiments (C) or three independent experiments with n = 3 technical replicates (D)

19 (shown as mean ± s.e.m. in D). Data are analyzed by two-tailed Student *t* test (D).

20 Abbreviations: n.s., not significant.

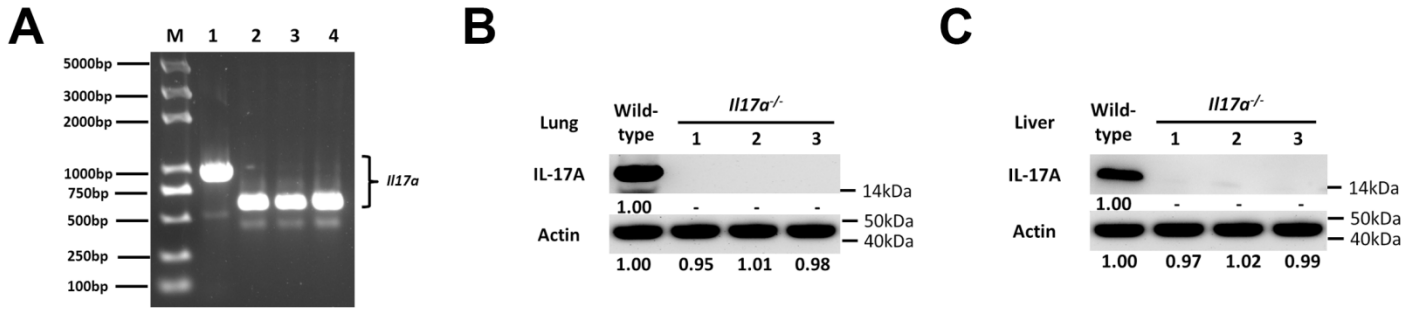

21 **Figure S4 Validation of *Il17a*-deficient mice. Related to Figure 2.**

22 (A) IL-17A expression in *Il17a*-deficient mice was analyzed by gel electrophoresis. M:

23 marker; 1: wild-type mice; 2-4: *Il17a*-deficient mice. (B-C) IL-17A expression in

24 lungs (B) and livers (C) of *Il17a*-deficient mice. Data are representative of three

25 independent experiments.

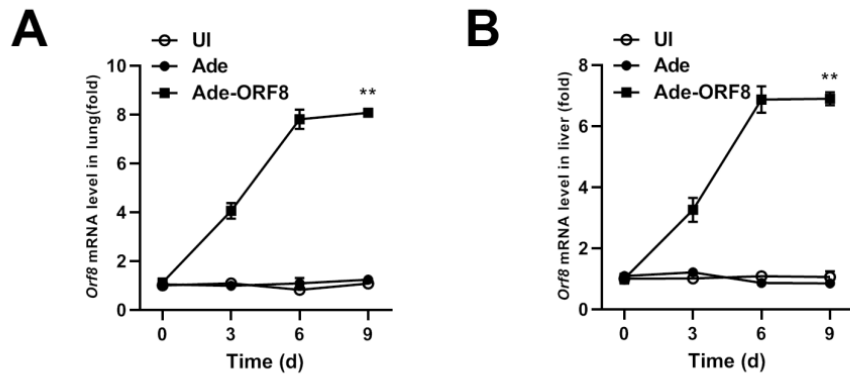

26 Figure S5 Adenovirus-mediated ORF8 expression in mice. Related to Figure 2.

27 (A-B) ORF8 expression in lungs (A) and livers (B) of *Il17a*-deficient mice after

28 injection of Ade-ORF8. UI: uninfected. Data are representative of three independent

29 experiments with  $n = 3$  technical replicates (shown as mean  $\pm$  s.e.m.). Data are

30 analyzed by two-tailed Student  $t$  test. \*\*,  $p < 0.01$ .

31 **Transparent Methods**

32 **Ethic statement**

33 This study was carried out in accordance with the Guidelines for the Care and Use of  
34 Animals of Chongqing University. All animal experimental procedures were approved  
35 by the Animal Ethics Committees of the School of Life Sciences, Chongqing  
36 University.

37

38 **Mice**

39 Six- to eight-week-old wild-type C57BL/6 mice and *Il17a*-deficient mice  
40 (C57BL/6N-*Il17a*<sup>em1cyagen</sup>) were purchased from Cyagen Biosciences (Guangzhou,  
41 China). Mice used in each experiment were half male and half female, and age- and  
42 sex- matched in experimental group and control group. All animal study protocols  
43 were reviewed and approved by Chongqing University School of Life Sciences  
44 review boards for animal studies. The upstream and downstream primers were  
45 designed on exon 1 and exon 3 of mouse *Il17a* (NM\_010552)  
46 (F-GCAAACATGAGTCCAGG, R-TGGTTTTACCCCATTC). Three knockout  
47 mice were randomly selected to extract genomic DNA, and PCR was used to detect  
48 the length of the knockout fragment (~212bp). Meanwhile, lung and liver were taken  
49 to detect IL17RA expression by Western Blotting.

50

51 **Plasmids construction**

52 Full-length coding sequence (CDS) of SARS-CoV-2 NSP2, ORF7a and ORF8 (NCBI

53 Accession number: NC\_045512.2) were synthesized by Beijing Genomics Institute  
54 (BGI, Beijing, China). NSP2, ORF7a, or ORF8 CDS was inserted into pCMV-HA  
55 (for eukaryotic expression) or pET-28a (+) (for protein production and purification),  
56 respectively. For GST pulldown assay, ORF8 CDS was inserted into pGEX-4T-1.  
57 Full-length CDS of IL17RA (NCBI Accession number: NM\_008359.2) was inserted  
58 into pCMV-Myc. Primers are as follows: F-AATTGTCGACTATGGCGATTCGG,  
59 R-ATAAGCGGCCGCCCAAATGTCTGAT. The pNL3.2.NF- $\kappa$ B-RE plasmid used in  
60 the measurement of NF- $\kappa$ B activity was purchased from Promega (Madison, WI,  
61 USA).

62

### 63 **Yeast two-hybrid screening**

64 Yeast two-hybrid screening was performed using the Matchmaker Gold Yeast  
65 Two-Hybrid System (Takara, Dalian, China). Briefly, a SARS-CoV-2 protein  
66 expressing library was constructed by using the Make Your Own "Mate & Plate"  
67 Library System (Takara) strictly according to the manufacturer's instructions. Then  
68 the library was cloned to a yeast Gal4 activation domain (AD) vector pGADT7, and  
69 transformed into yeast strain Y187 to serve as "prey"; IL17RA cDNA was cloned to a  
70 Gal4 binding domain (BD) vector pGBKT7, and transformed into yeast strain  
71 Y2HGold to serve as "bait". Prey and bait were combined together to screen for  
72 positive interactions. Colonies grown on the synthetic defined (SD) plate lacking  
73 adenine, histidine, leucine, and tryptophan (SD/-Ade-His-Leu-Trp) were picked for  
74 Sanger sequencing (Supplemental File Sets).



75

## 76 **Protein production and purification**

77 Production and purification of ORF8, NSP2, or ORF7a protein were performed as  
78 follows(Walls et al., 2020): pET-28a(+)-ORF8, pET-28a(+)-NSP2, or  
79 pET-28a(+)-ORF7a construct was transformed into *E. coli* BL21 (DE3) and cultured  
80 in LB media at 37 °C until OD600 reached 0.6. The recombinant expression of  
81 His-tagged protein was induced by adding isopropyl β-D-thiogalactoside (IPTG) with  
82 a final concentration of 125 μM and stimulating for 16 h at 12 °C. Cells were  
83 harvested by centrifugation at 4 °C, and lysed by freezing/thawing method.  
84 Purification of the supernatants containing His-tagged protein was performed by  
85 Ni-affinity chromatography in an ÄKTA Primer FPLC system (GE Healthcare Life  
86 Sciences, Chicago, IL, USA) using the HisTrap FF columns (GE Healthcare Life  
87 Sciences) according to the manufacturer's instructions.

88

## 89 **Cell culture and treatment**

90 HEK293T cells were purchased from American Type Culture Collection (ATCC,  
91 Manassas, VA, USA). The culture medium was composed of Dulbecco's Modified  
92 Eagle's Medium (DMEM, Gibco, San Jose, CA, USA) and 10% fetal bovine serum  
93 (Gibco). Plasmid DNA was transfected into indicated cells using Lipofectamine 3000  
94 Transfection Reagent (Invitrogen, Life Technologies, CA, USA) according to the  
95 manufacturer's instructions. *III17ra<sup>-/-</sup>* and *III17a<sup>-/-</sup>* RAW264.7 were generated using  
96 CRISPR-Cas9. To be detailed, two sgRNAs were designed for each gene

97 (*Il17ra*-sgRNA1: TCCACTCAACATGCAACACA; *Il17ra*-sgRNA2:  
98 GGGGGTGGATTCATTCCACA; *Il17a*-sgRNA1: CTCAGCGTGTCCAAACACTG;  
99 *Il17a*-sgRNA2: GAACGGTTGAGGTAGTCTGA), and ligated into  
100 pSpCas9(BB)-2A-Puro (PX459) after being digested by Bbs I. The recombinant was  
101 then transfected into RAW264.7 (ATCC) using Lipo 3000 Transfection Reagent  
102 (Invitrogen). After 48 h, DMEM containing 3 µg/mL puromycin was used for  
103 screening for 7 days to obtain the cell pool. Half of the cells were taken for TIDE  
104 analysis (<http://shinyapps.datacurators.nl/tide/>), and the remaining cells were used for  
105 limiting dilution to obtain the cell clone. Genomic DNA was extracted and sequenced,  
106 and the indels were analyzed. For the obtained homozygous knockout monoclonal,  
107 total cell protein was extracted and Western Blotting was used to detect expressions of  
108 IL17RA and IL-17A. *Il17ra*<sup>+/+</sup> PMs were isolated as follows (Kim et al., 2016) : mice  
109 were intraperitoneally injected with HBSS containing 2 mM EDTA and 2% FBS.  
110 After flushing the abdominal cavity, 5 ml of flushing solution was collected and  
111 centrifuged 10 min at 400×g, 4°C. Supernatant was discarded and cell pellet was  
112 resuspended in cold DMEM/F12. The cells were cultured at 37°C for 2 h and attached  
113 to the substrate. The nonadherent cells were removed by gently washing with warm  
114 PBS three times. The purified PMs were plated at a density of 1×10<sup>6</sup> cells/60 mm  
115 plastic dish. Afterwards, purified NSP2, ORF7a, or ORF8 was added to culture media  
116 of *Il17ra*<sup>+/+</sup> PMs for treatment. After 24 h, cells were harvested for  
117 immunoprecipitation. In addition, purified ORF8 was added to culture media of  
118 *Il17ra*<sup>-/-</sup> RAW264.7 or *Il17a*<sup>-/-</sup> RAW264.7 for treatment. After 24 h, cells were

119 harvested for immunoprecipitation.

120

### 121 **GST pulldown assay**

122 GST pulldown assay was performed using the GST Protein Interaction Pull-Down Kit  
123 (Thermo Fisher Scientific, San Jose, CA, USA) following the manufacturer's  
124 instructions. Briefly, the glutathione-S-transferase (GST)-tagged SARS-CoV-2 ORF8  
125 fusion proteins were expressed in *Escherichia coli* (*E. coli*) and immobilized on the  
126 glutathione agarose resin, and then incubated with HEK293T cell lysates transfected  
127 with pCMV-Myc-IL17RA. After incubation at 4°C for at least 4 h (overnight if  
128 possible) with gentle rocking motion on a rotating platform, elution was collected for  
129 detection of protein interaction by Western Blotting.

130

### 131 **Immunoblot and Immunoprecipitation**

132 Immunoblot analysis was performed as follows(Fu et al., 2020) : total proteins were  
133 collected and separated by SDS-PAGE, and transferred to PVDF membrane. Blots  
134 were probed with 1/1000 anti-Actin (AF5001), 1/1000 anti-GST (AF2299) (Beyotime,  
135 Shanghai, China), 1/1000 anti-HA (SAB2702196), 1/1000 anti-Myc (SAB2702192)  
136 (Sigma-Aldrich, St. Louis, MO, USA), 1/200 anti-IL-17 (sc-374218) (Santa Cruz  
137 Biotechnology, Santa Cruz, CA, USA), 1/200 anti-IL17RA (PA5-47199), 1/200  
138 anti-ACT1 (14-4040-82) (Invitrogen), 1/200 anti-phospho-I $\kappa$ B $\alpha$  (Ser32/36) (9246),  
139 1/500 anti-I $\kappa$ B $\alpha$  (9242) (Cell Signaling Technology, Inc., Danvers, MA, USA)  
140 antibodies. Co-immunoprecipitation was performed according to previous studies

141 (Lafont et al., 2018; Su et al., 2019). Briefly, cells were harvested and lysed with  
142 RIPA Lysis Buffer (50 mM Tris (pH 7.4), 150 mM NaCl, 1% Triton X-100, 1%  
143 sodium deoxycholate, 0.1% SDS) (P0013B, Beyotime) containing protease inhibitor  
144 cocktail. Cell lysate was centrifuged at 12, 000×g for 10 min. Part of the supernatant  
145 was taken to determine the total protein concentration and used as the input for  
146 immunoblotting, and the remaining supernatant was incubated with appropriate  
147 antibodies and Protein A/G beads (Thermo Fisher Scientific) overnight at 4°C.  
148 Precipitated protein complex was mixed with 5× SDS Loading Buffer and boiled at  
149 98°C for 8 min, followed by immunoblotting with indicated antibodies.

150

#### 151 **NF-κB activity assay**

152 Dual Luciferase Reporter (DLR) Assay System (Promega) was used to perform  
153 NF-κB activity assays as follows(Fu et al., 2020) : firefly luciferase plasmid  
154 pNL3.2.NF-κB-RE and Renilla luciferase plasmid pRL-SV40 (internal control) were  
155 co-transfected to cells. Twenty-four h after treatment or stimulation, cell lysates were  
156 harvested for DLR assays. Data were collected with a VICTOR X5 Multilabel Plate  
157 Reader (PerkinElmer, Waltham, MA, USA). The relative NF-κB activity was  
158 measured by Firefly luciferase luminescence divided by Renilla luciferase  
159 luminescence.

160

#### 161 **Exposure of mice to adenoviral vectors**

162 The construction and characterization of recombinant adenovirus vector encoding

163 SARS-CoV-2 ORF8 (Ade-ORF8) were referred as follows(Huang et al., 2019): the  
164 CDS of ORF8 was cloned into pENTR™/D-TOPO vector (Thermo Fisher Scientific)  
165 followed by recombination into the pAd/CMV/V5-DEST (Thermo Fisher Scientific).  
166 The replication-deficient recombinant Ade-ORF8 adenovirus was produced in  
167 HEK293A cells. Mice were anesthetized, and then intratracheally instilled with  
168 Ade-ORF8 at  $10^8$  PFU/mouse diluted in 50  $\mu$ L PBS.

169

#### 170 **IL17RA blocking**

171 Anti-mouse IL17RA antibody (MAB4481) and mouse IgG1 isotype control  
172 (MAB002) were purchased from R&D Systems. For injections, antibody stocks were  
173 diluted in sterile PBS and each mouse received 200  $\mu$ g per injection.

174

#### 175 **H&E staining**

176 On the 9<sup>th</sup> day after infection, the lung and liver of mice were fixed with 10% buffered  
177 formaldehyde for more than 24 h, embedded in paraffin, sectioned, and stained with  
178 H&E according to the standard procedure. Photographs were obtained by microscope  
179 (Carl Zeiss, Jena, Germany). A scoring system was set as follows (Kleiner et al., 2005;  
180 Matute-Bello et al., 2011) : five fields at 200 $\times$  magnification were randomly selected  
181 for each slice. The lung scoring criteria are as follows: 0, pulmonary lobes lacked  
182 lesions; 1, multifocal lesions with mild lymphocyte and macrophage infiltration; 2,  
183 mild infiltration of peri-bronchial, peri-vascular and alveolar; 3, small range of  
184 blocked terminal bronchioles, fibroplasia or organization; 4, wide range of alveolar

185 necrosis and hyaline thrombus. The liver scoring criteria are as follows: 0, hepatic  
186 lobules lacked lesions; 1, scattered inflammation with  $\leq 3$  lesions in hepatic lobules; 2,  
187 3-7 lesions in hepatic lobules, accounting for  $< 1/3$  of the hepatic lobule; 3, scattered  
188 inflammation with  $> 7$  lesions, accounting for  $1/3$ - $2/3$  of the hepatic lobule; 4,  
189 inflammatory lesions spread throughout hepatic lobules, with large areas of  
190 hepatocyte necrosis.

191

### 192 **Enzyme-linked immunosorbent assay (ELISA)**

193 Mouse TNF- $\alpha$ , IL-1 $\beta$ , IL-6, IL-12 ELISA kits were purchased from BD Biosciences  
194 (Franklin Lakes, NJ, USA). Cell culture supernatants were assayed according to the  
195 manufacturer's protocols. Mice were sacrificed and lungs/livers were quickly excised,  
196 rinsed of blood, and homogenized by adding 1 mL homogenization buffer (PBS  
197 containing 0.05% sodium azide, 0.5% Triton X-100, and a protease inhibitor cocktail,  
198 pH 7.2, 4°C), and then sonicated for 10 minutes. Homogenates were centrifuged at  
199 12,000 $\times$ g for 10 minutes, and the supernatant was taken to determine the total protein  
200 concentration, followed by ELISA analysis. The concentration of each cytokine was  
201 calculated against a standard curve.

202

### 203 **Statistical analysis**

204 Two-tailed Student's *t* test was used to compare the means between two groups. A  
205 value of  $P < 0.05$  was considered significant.

206

207 **Supplemental References**

- 208 Fu, B., Yin, S., Lin, X., Shi, L., Wang, Y., Zhang, S., Zhao, Q., Li, Z., Yang, Y., and Wu, H. (2020). PTPN14  
209 aggravates inflammation through promoting proteasomal degradation of SOCS7 in acute liver failure.  
210 *Cell death & disease* *11*, 803.
- 211 Huang, J., Snook, A.E., Uitto, J., and Li, Q. (2019). Adenovirus-Mediated ABCC6 Gene Therapy for  
212 Heritable Ectopic Mineralization Disorders. *The Journal of investigative dermatology* *139*, 1254-1263.
- 213 Kim, K.W., Williams, J.W., Wang, Y.T., Ivanov, S., Gilfillan, S., Colonna, M., Virgin, H.W., Gautier, E.L., and  
214 Randolph, G.J. (2016). MHC II+ resident peritoneal and pleural macrophages rely on IRF4 for  
215 development from circulating monocytes. *The Journal of experimental medicine* *213*, 1951-1959.
- 216 Kleiner, D.E., Brunt, E.M., Van Natta, M., Behling, C., Contos, M.J., Cummings, O.W., Ferrell, L.D., Liu,  
217 Y.C., Torbenson, M.S., Unalp-Arida, A., et al. (2005). Design and validation of a histological scoring  
218 system for nonalcoholic fatty liver disease. *Hepatology* *41*, 1313-1321.
- 219 Lafont, E., Draber, P., Rieser, E., Reichert, M., Kupka, S., de Miguel, D., Draberova, H., von  
220 Massenhausen, A., Bhamra, A., Henderson, S., et al. (2018). TBK1 and IKKepsilon prevent TNF-induced  
221 cell death by RIPK1 phosphorylation. *Nature cell biology* *20*, 1389-1399.
- 222 Matute-Bello, G., Downey, G., Moore, B.B., Groshong, S.D., Matthay, M.A., Slutsky, A.S., Kuebler, W.M.,  
223 and Acute Lung Injury in Animals Study, G. (2011). An official American Thoracic Society workshop  
224 report: features and measurements of experimental acute lung injury in animals. *American journal of*  
225 *respiratory cell and molecular biology* *44*, 725-738.
- 226 Su, Y., Huang, J., Zhao, X., Lu, H., Wang, W., Yang, X.O., Shi, Y., Wang, X., Lai, Y., and Dong, C. (2019).  
227 Interleukin-17 receptor D constitutes an alternative receptor for interleukin-17A important in  
228 psoriasis-like skin inflammation. *Science immunology* *4*.
- 229 Walls, A.C., Park, Y.J., Tortorici, M.A., Wall, A., McGuire, A.T., and Velesler, D. (2020). Structure, Function,  
230 and Antigenicity of the SARS-CoV-2 Spike Glycoprotein. *Cell* *181*, 281-292 e286.

231
